# Supplementary material for: Molecular Simulation of Adsorption Separation of CO2 from Combustion Exhaust Mixture of Commercial Zeolites
Source: MDPI journal article supplement (doi:10.3390/pr11102987), 2023-10-16
Supplement: s1 [file s1]

## Supplementary Materials

Table S1 L-J potential function parameters

| Atoms                    | $\epsilon(\text{kcal/mol})$ | $\sigma(\text{\AA})$ | Charge(e) |
|--------------------------|-----------------------------|----------------------|-----------|
| Si (zeolite)             | 0.0437                      | 2.58175              | 2.4       |
| Al (zeolite)             | 0.31                        | 4.39                 | 1.4       |
| O (zeolite)              | 0.1053                      | 3.82                 | -1.2      |
| Na (zeolite)             | 0.5                         | 3.144                | 1         |
| Ca (zeolite)             | 0.05                        | 3.472                | 2         |
| C (CO <sub>2</sub> -13X) | 0.0595                      | 3.081                | 0.6       |
| O (CO <sub>2</sub> -13X) | 0.17                        | 3.386                | -0.3      |
| H (H <sub>2</sub> O-13X) | 0.0152                      | 3.195                | 0.335     |
| O (H <sub>2</sub> O-13X) | 0.1                         | 3.3                  | -0.67     |
| S (SO <sub>2</sub> -13X) | 0.2899                      | 4.063                | 0.328     |
| O (SO <sub>2</sub> -13X) | 0.1141                      | 3.379                | -0.164    |
| N (NO-13X)               | 0.1001                      | 3.64                 | 0         |
| O (NO-13X)               | 0.1242                      | 3.2888               | 0         |
| C (CO <sub>2</sub> -5A)  | 0.0595                      | 3.081                | 0.1       |
| O (CO <sub>2</sub> -5A)  | 0.17                        | 3.386                | -0.05     |
| H (H <sub>2</sub> O-5A)  | 0.0152                      | 3.195                | 0.5       |
| O (H <sub>2</sub> O-5A)  | 0.1                         | 3.3                  | -1        |
| S (SO <sub>2</sub> -5A)  | 0.2899                      | 4.063                | 0.4710    |
| O (SO <sub>2</sub> -5A)  | 0.1141                      | 3.379                | -0.2355   |
| N (NO-5A)                | 0.1001                      | 3.64                 | 0.073     |
| O (NO-5A)                | 0.1242                      | 3.2888               | -0.073    |
| O (O <sub>2</sub> )      | 0.1                         | 3.3                  | 0         |
| N (N <sub>2</sub> )      | 0.0774                      | 3.4                  | 0         |

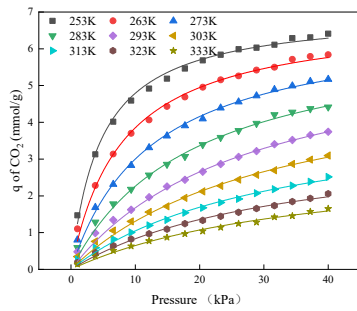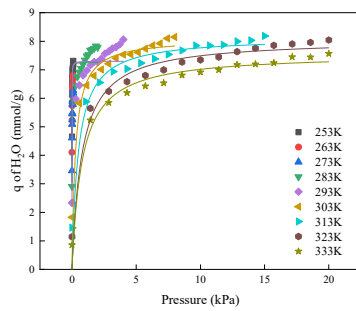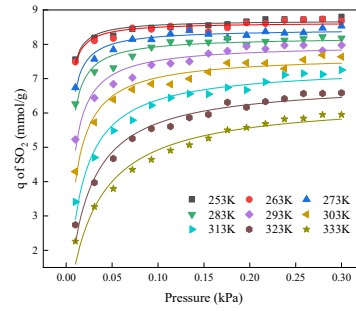

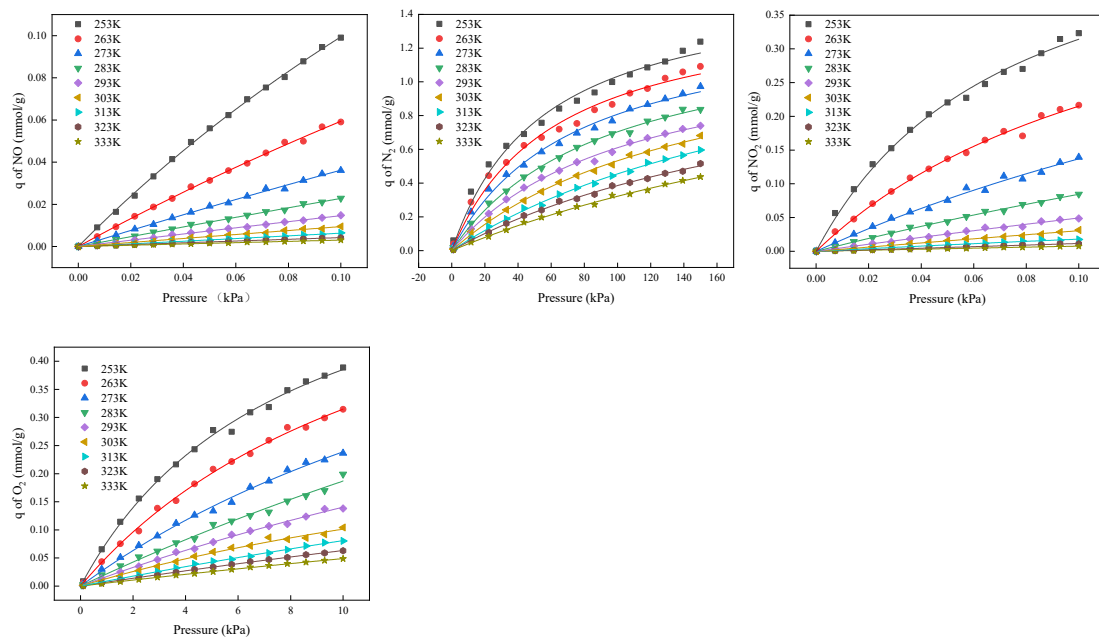

**Figure S1.** Isotherms of pure components on 13X

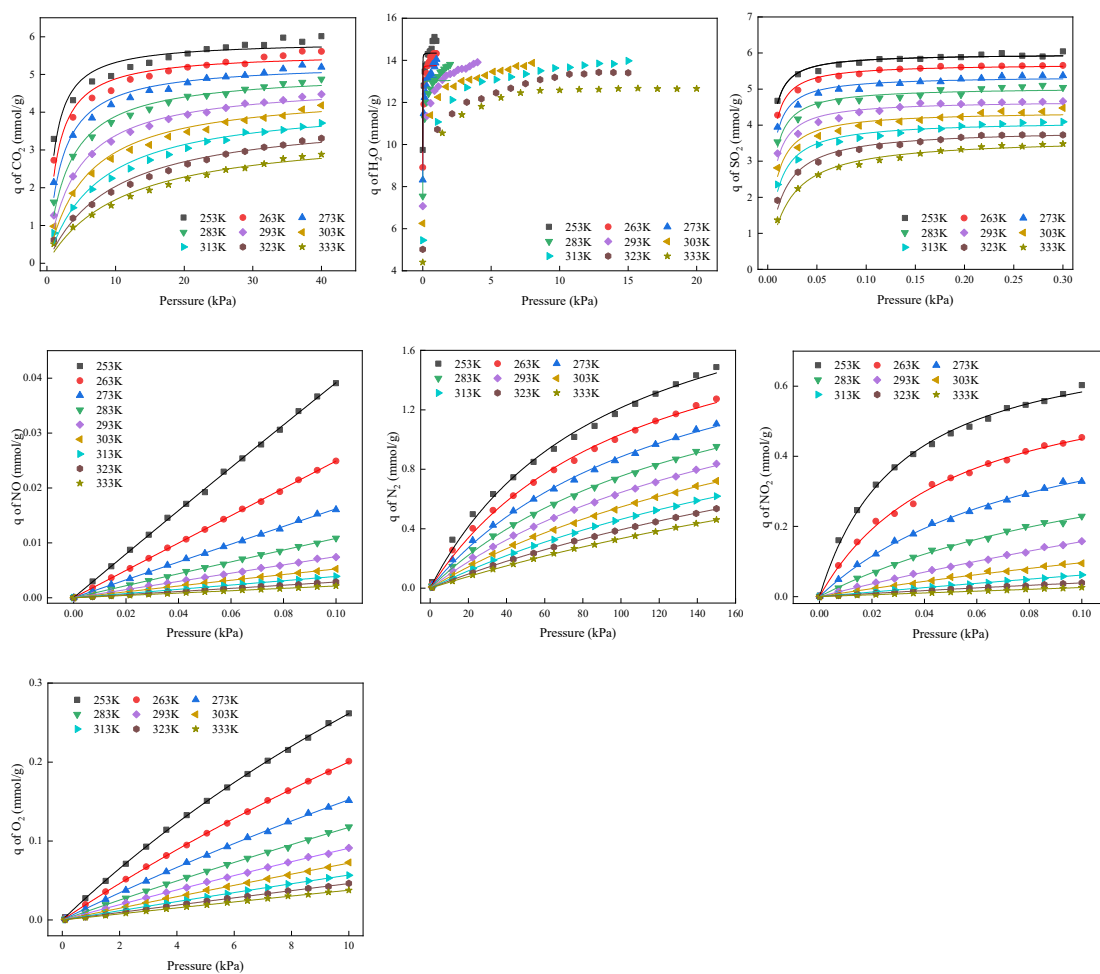

**Figure S2.** Isotherms of pure components on 5A.

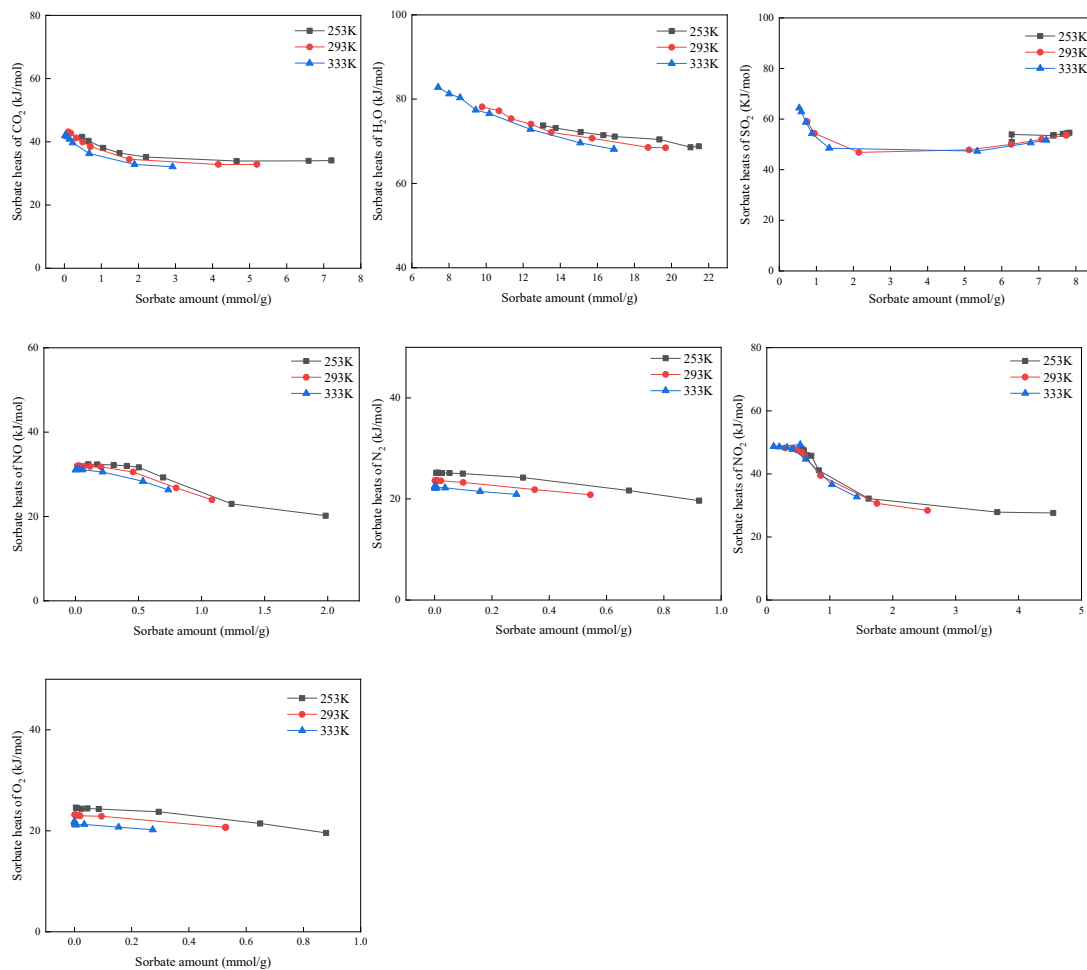

**Figure S3.** The variation of adsorption heat of pure components on 13X zeolite with adsorption capacity.

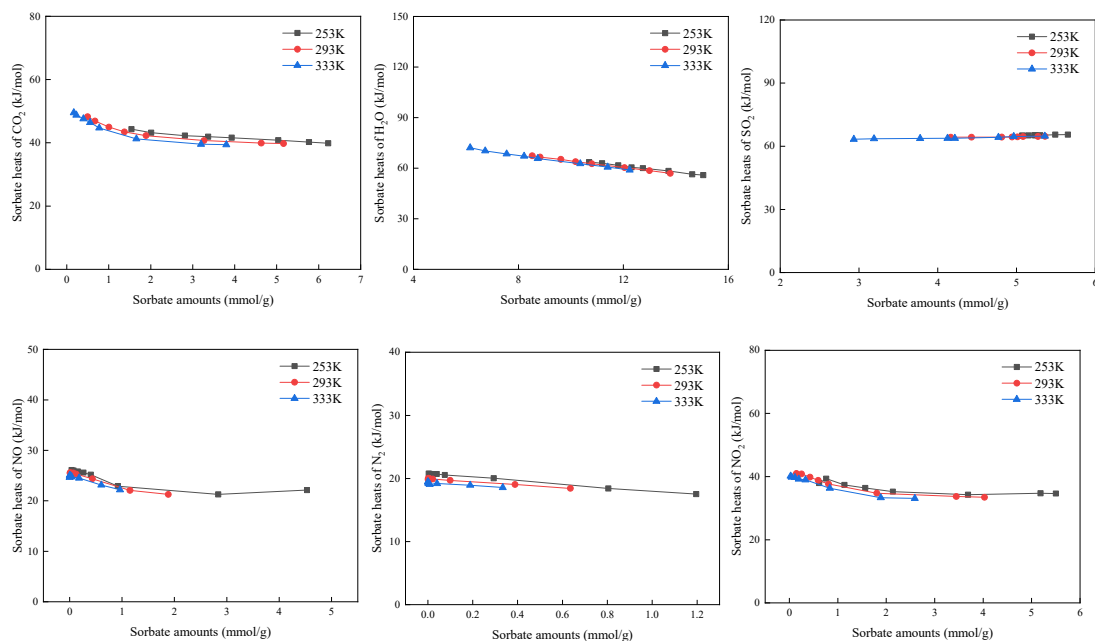

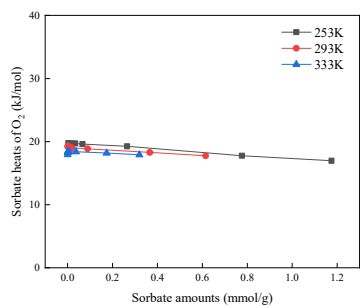

**Figure S4.** The variation of adsorption heat of pure components on 5A zeolite with adsorption capacity.

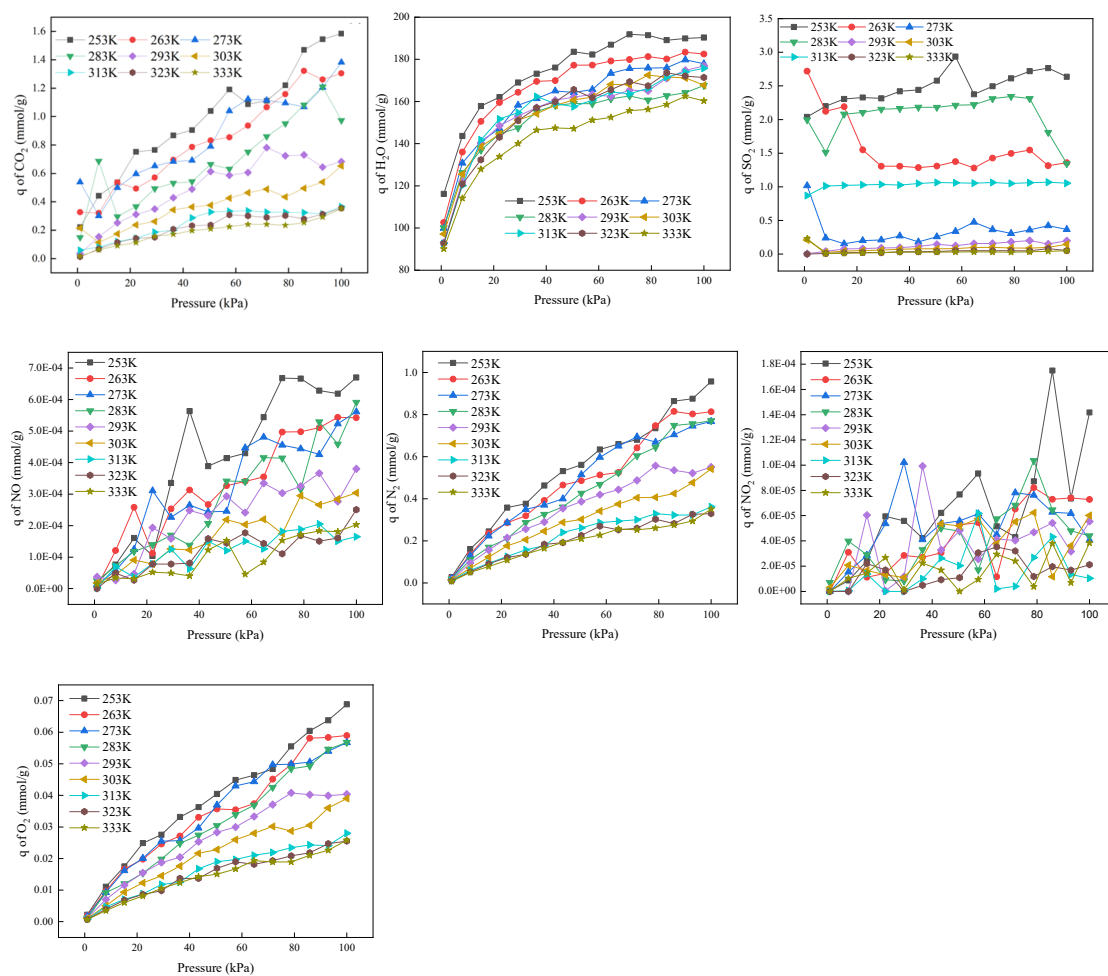

**Figure S5.** Isotherms of mixture on 13X.

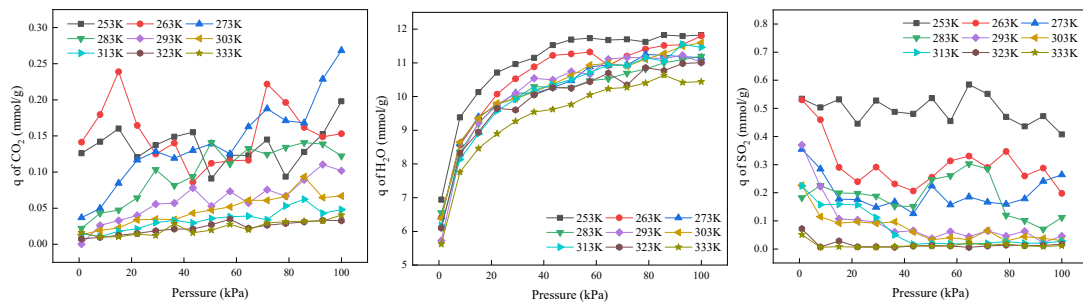

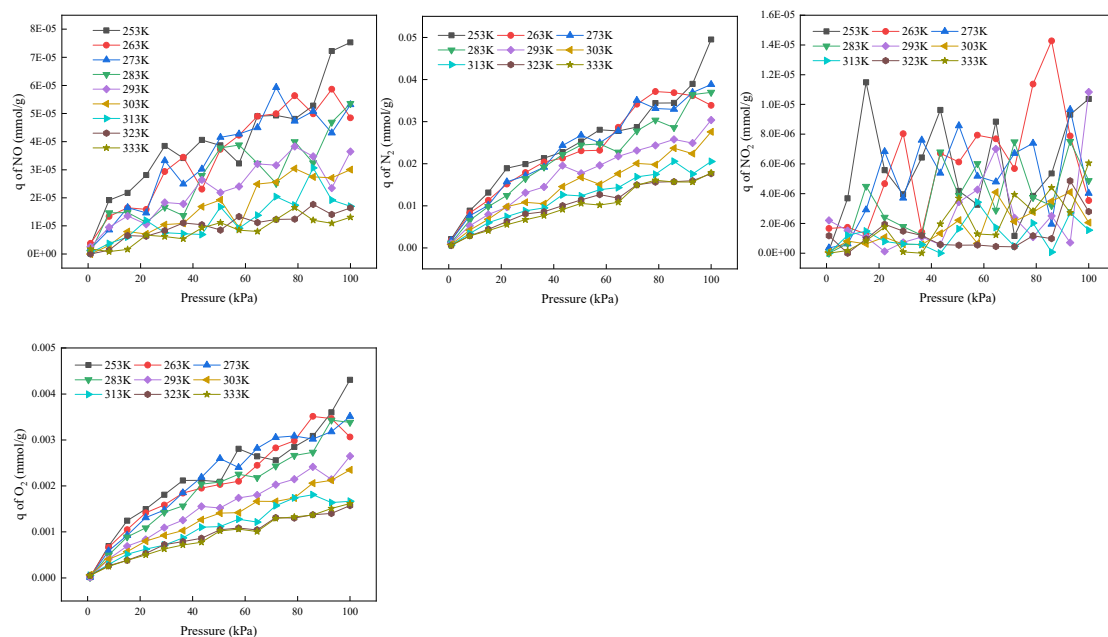

**Figure S6.** Isotherms of mixture on 5A.

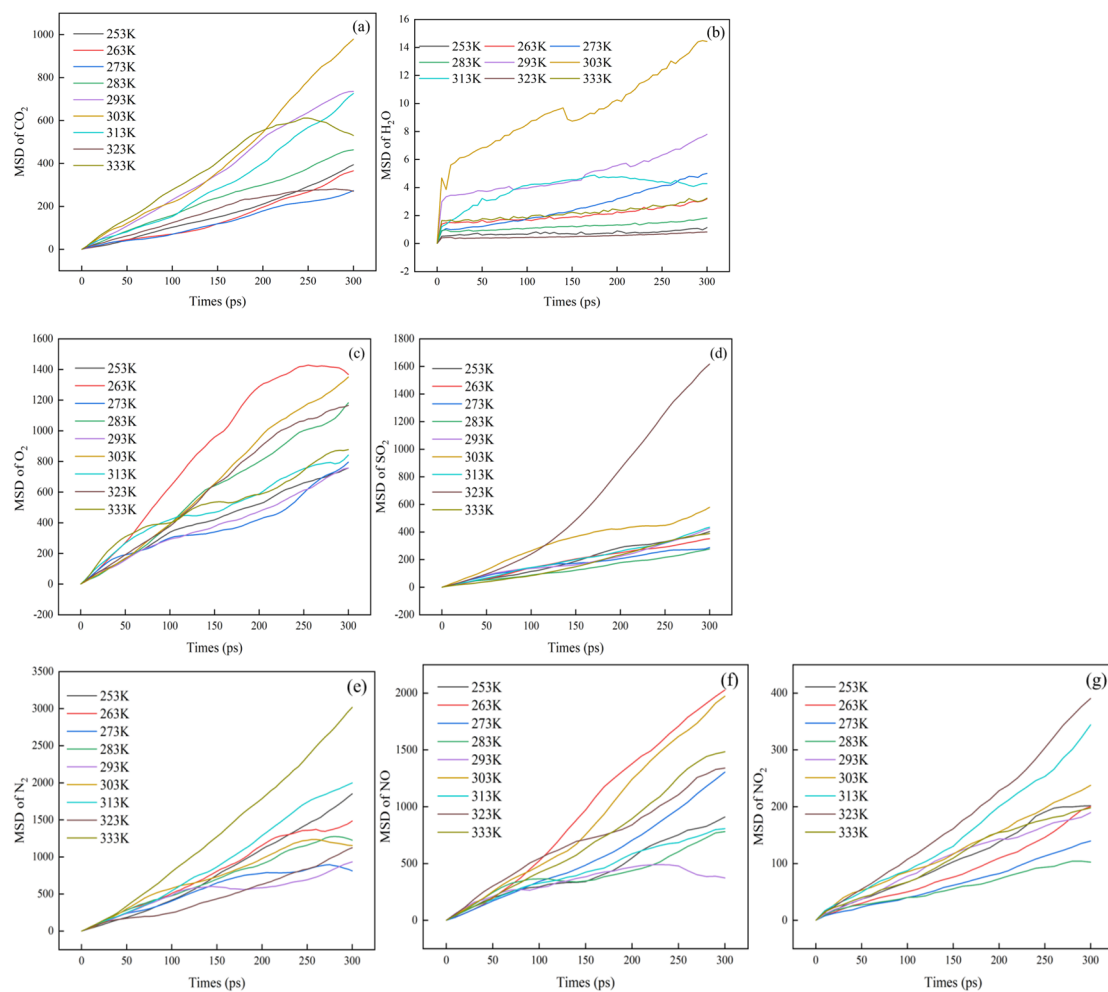

**Figure S7.** The variation of diffusion coefficients with temperature of (a) CO<sub>2</sub> (b) H<sub>2</sub>O (c) SO<sub>2</sub> (d) O<sub>2</sub> (e) N<sub>2</sub> (f) NO (g) NO<sub>2</sub> on 13X.

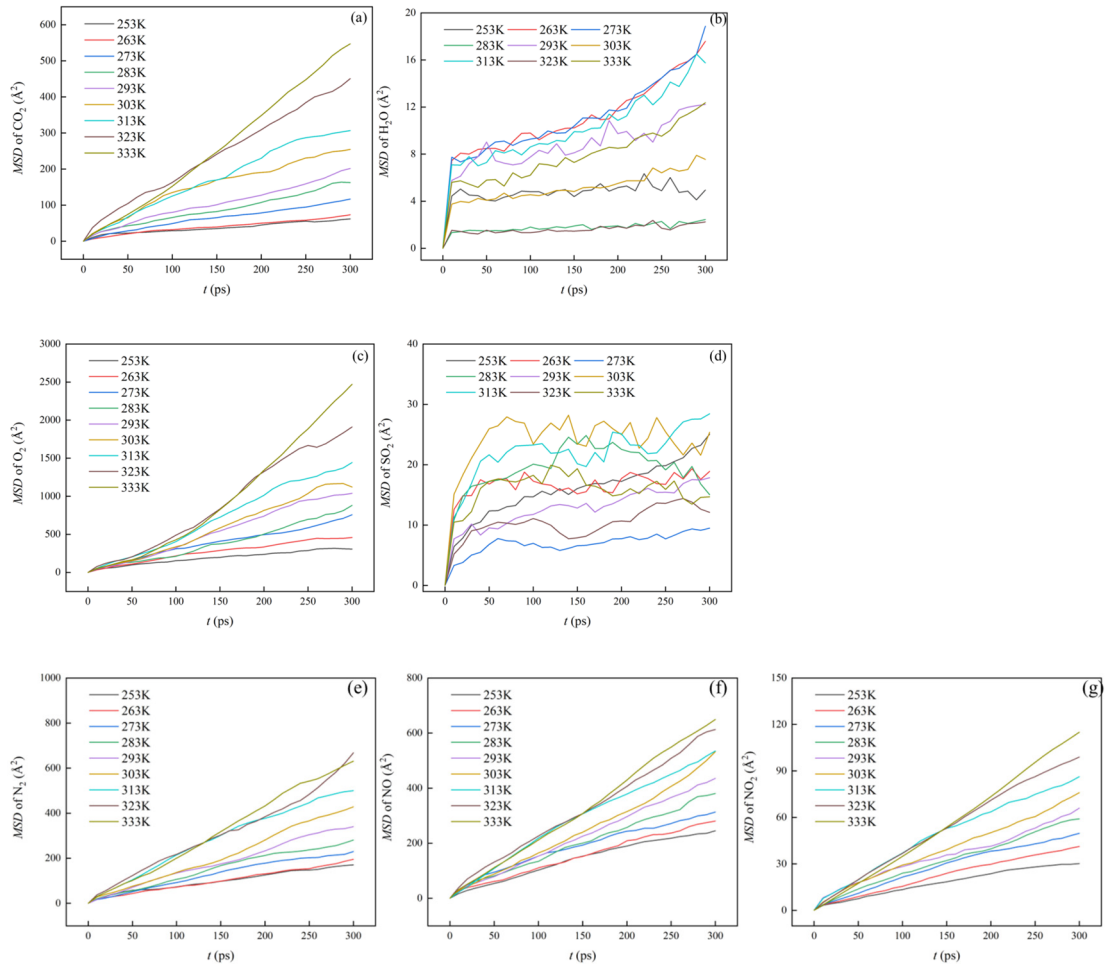

**Figure S8.** The variation of diffusion coefficients with temperature of (a) CO<sub>2</sub> (b) H<sub>2</sub>O (c) SO<sub>2</sub> (d) O<sub>2</sub> (e) N<sub>2</sub> (f) NO (g) NO<sub>2</sub> on 5A.

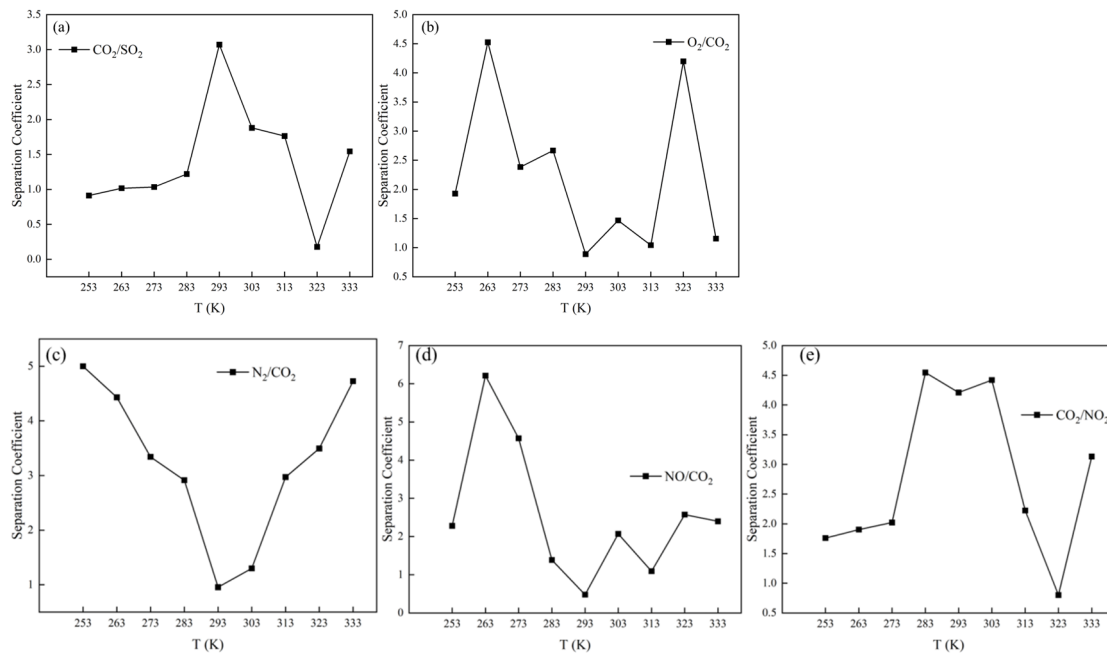

**Figure S9.** Adsorption kinetics selectivity of (a) SO<sub>2</sub> (b) O<sub>2</sub> (c) N<sub>2</sub> (d) NO (e) NO<sub>2</sub> from CO<sub>2</sub> on 13X.

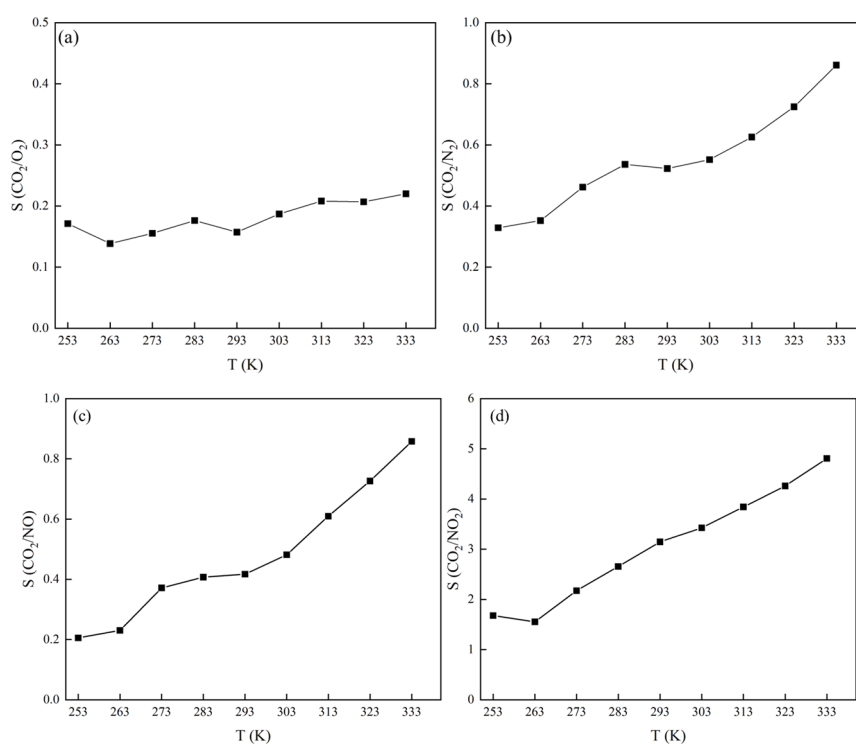

**Figure S10.** Adsorption kinetics selectivity of (a) O<sub>2</sub> (b) N<sub>2</sub> (c) NO (d) NO<sub>2</sub> from CO<sub>2</sub> on 5A.
